# Supplementary material for: Manganese oxides with hierarchical structures derived from coordination polymers and their enhanced catalytic activity at low temperature for selective catalytic reduction of NOx
Source: Royal Society of Chemistry journal article supplement (doi:10.1039/c9dt03043c), 2019-01-01
Supplement: c9dt03043c1.pdf [file c9dt03043c1.pdf]

# Manganese oxides hierarchical structures derived from coordination polymers and their enhanced catalytic activity at low temperature for selective catalytic reduction of NO<sub>x</sub>

## Supporting Information.

### Table of contents

**Table S1.** List of chemicals used for the synthesis of Mn-CP with their suppliers.

**Fig. S1.** FT-IR spectra of (a) sodium fumarate (b) Mn-CP.

**Fig. S2.** (a) Low- and (b) high-magnification FESEM images of the Mn-CP. (c - f) Elemental mapping data displaying the distribution of C, O and Mn in Mn-CP

**Fig. S3.** TGA curve of Mn-CP.

**Fig. S4.** (a) N<sub>2</sub> adsorption-desorption (BET isotherm) and (b) BJH pore size distribution of the MnO<sub>x</sub> catalysts.

**Fig. S5.** (a) Low-magnification and (b) high-magnification FESEM images of MnO<sub>x</sub>-350 after catalytic reaction for 10 hours.

**Fig. S6.** SEM images of MnO<sub>x</sub>-300

**Fig. S7.** NO<sub>x</sub> conversion efficiency of the MnO<sub>x</sub>-300

**Graphical abstract.**

| Chemicals                           | Suppliers                         |
|-------------------------------------|-----------------------------------|
| Pluronic F-127                      | Sigma-Aldrich                     |
| Potassium bromide                   | Sigma-Aldrich                     |
| Manganese(II) chloride tetrahydrate | Junsei Chemical Co., Ltd.         |
| Disodium fumarate                   | Tokyo Chemical Industry Co., Ltd. |
| Acetone                             | Samchun Pure Chemical Co., Ltd.   |

**Table S1.** List of chemicals with their suppliers used for the synthesis of Mn-CP.

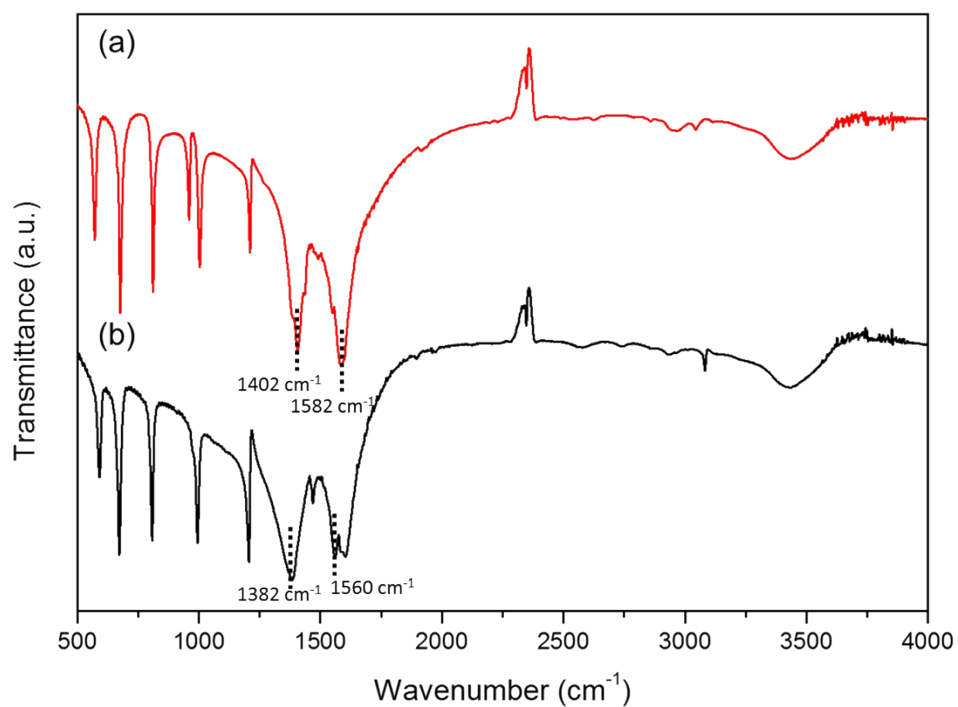

**Fig. S1.** FT-IR spectra of (a) sodium fumarate (b) Mn-CP.

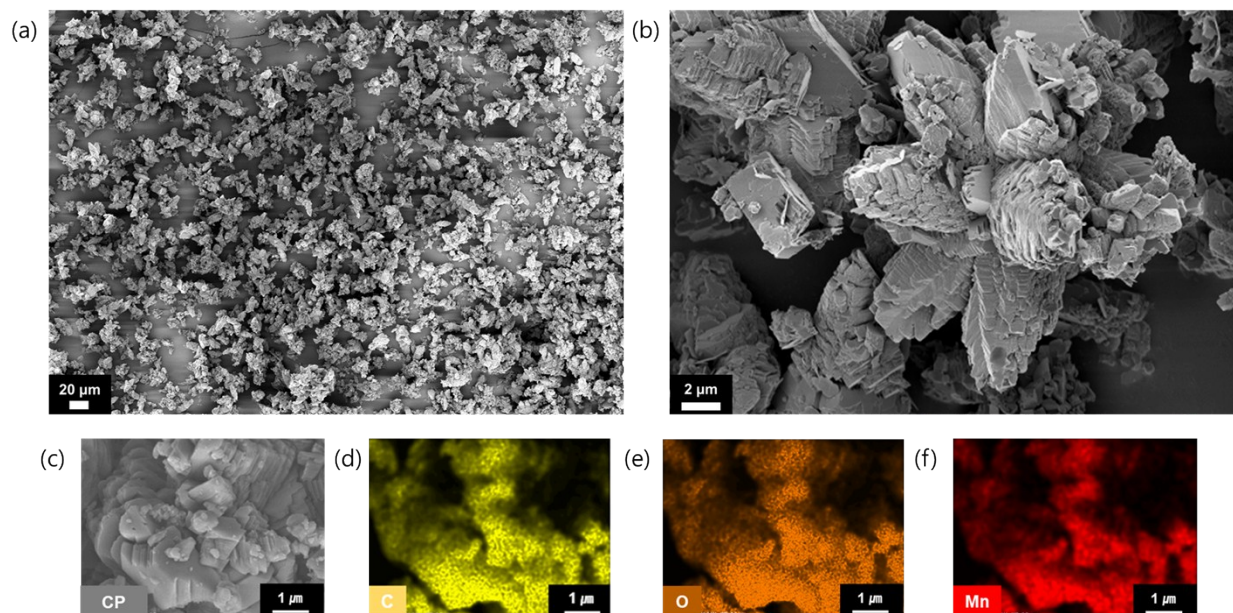

**Fig. S2.** (a) Low- and (b) high-magnification FESEM images of the Mn-CP. (c - f) Elemental mapping data displaying the distribution of C, O and Mn in Mn-CP

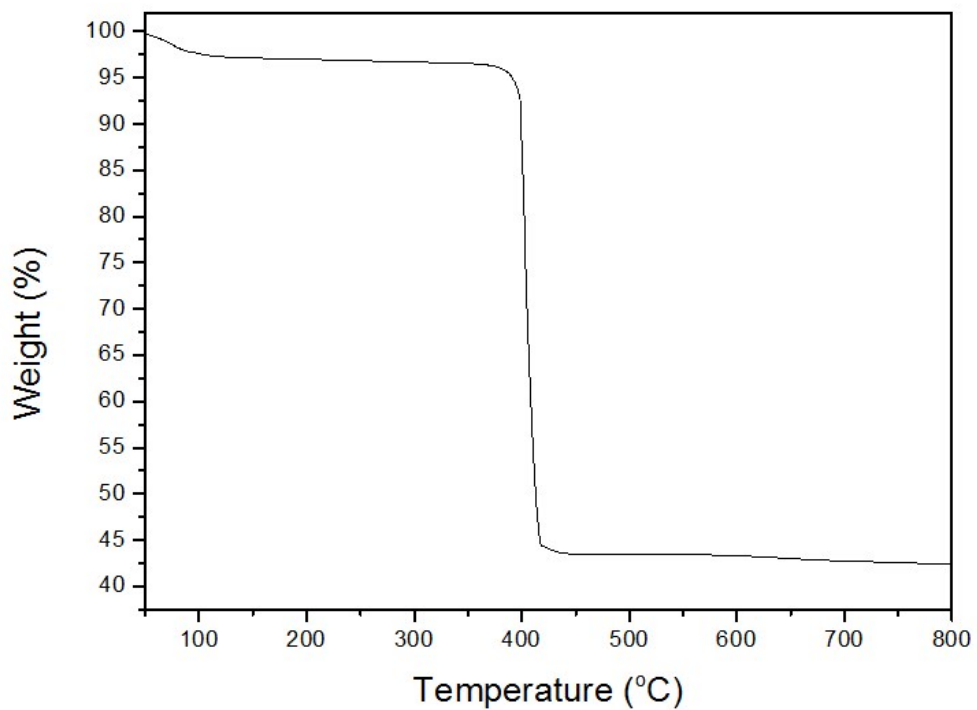

**Fig. S3.** TGA curve of Mn-CP.

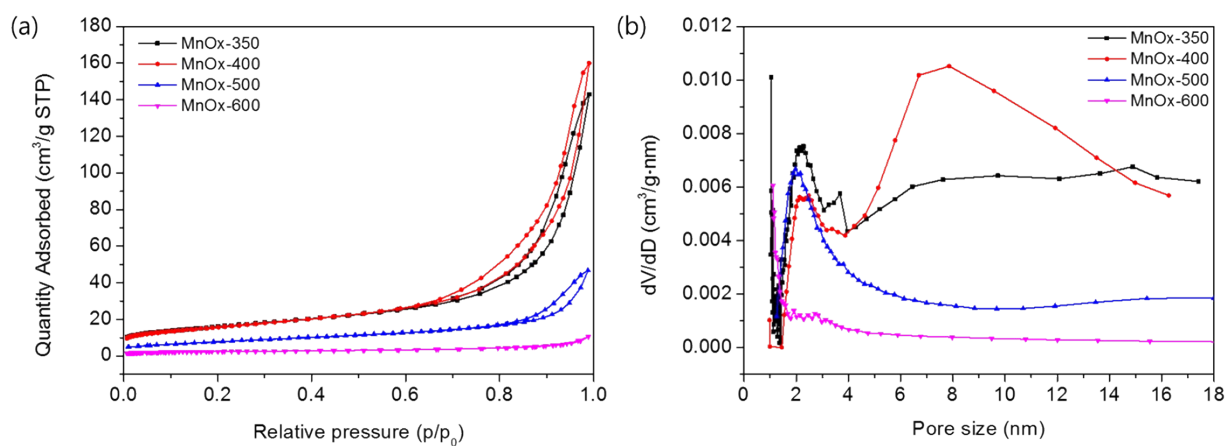

**Fig. S4.** (a) N<sub>2</sub> adsorption-desorption (BET isotherm) and (b) BJH pore size distribution of the MnOx catalysts.

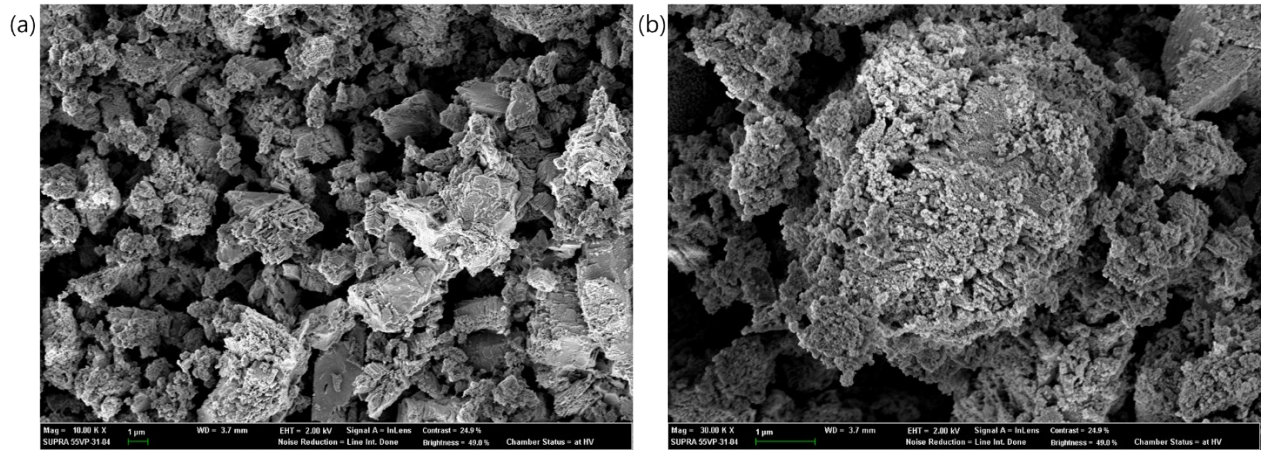

**Fig. S5.** (a) Low-magnification and (b) high-magnification FESEM images of MnOx-350 after catalytic reaction for 10 hours.

$$\frac{[400(\text{ppm})]_{in} - [34.8(\text{ppm})]_{out}}{[400(\text{ppm})]_{in}} \times 100(\%) = 91.3(\%) \quad (1)$$

$$\frac{[400(\text{ppm})]_{in} - [36(\text{ppm})]_{out}}{[400(\text{ppm})]_{in}} \times 100(\%) = 91(\%) \quad (2)$$

**Equation S1.** The catalytic conversion of NO<sub>x</sub> using MnO<sub>x</sub>-350 at (1) 150 °C and (2) 200 °C.

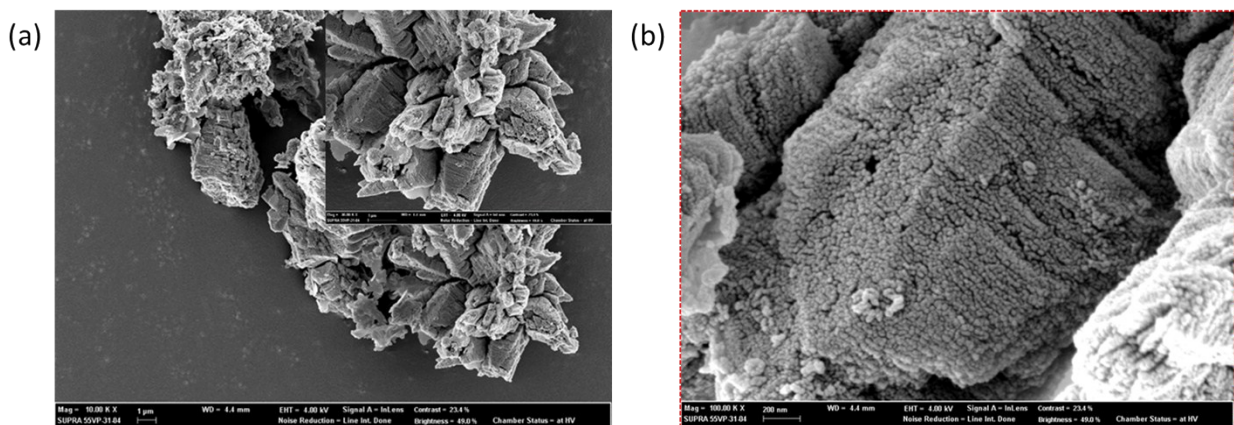

**Fig. S6** SEM images of MnO<sub>x</sub>-300

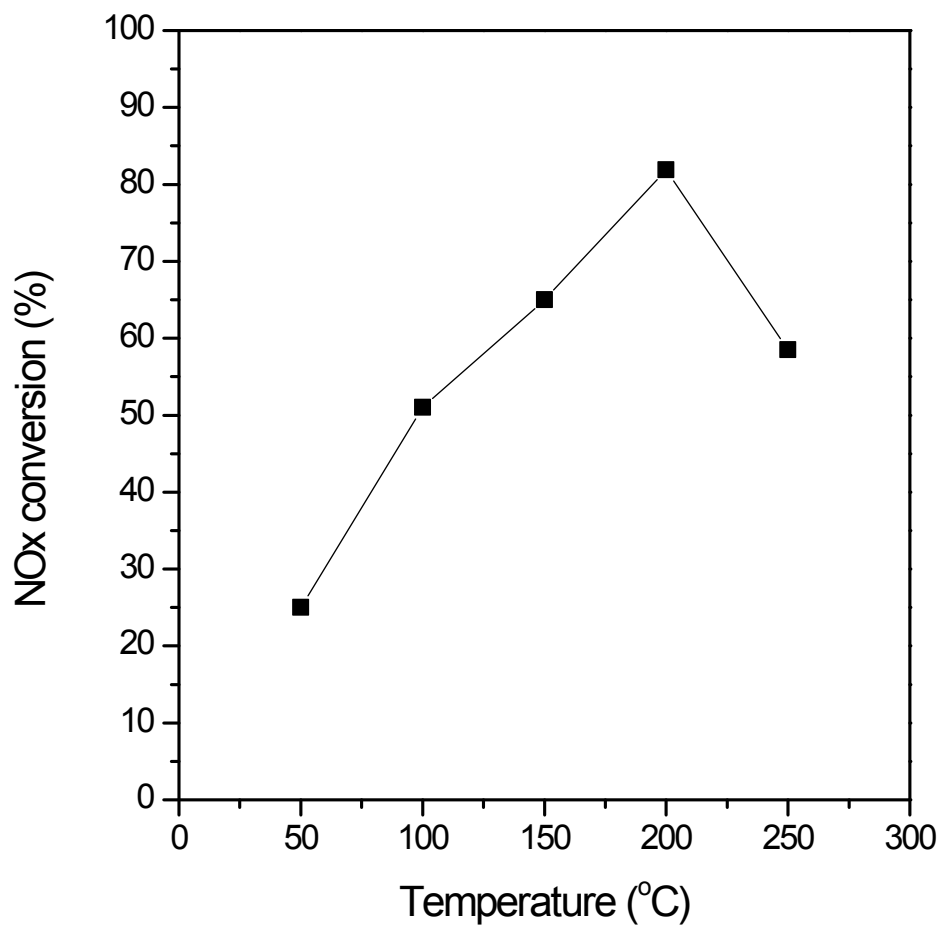

**Fig. S7** NOx conversion efficiency of the MnOx-300

AUTHOR INFORMATION

**Corresponding Author**

sykwak@snu.ac.kr.
